# Supplementary material
Source: PubMed Central journal article supplement (PMC2947219)
Supplement: JCI41805sd.pdf [file JCI41805sd.pdf]

**A**

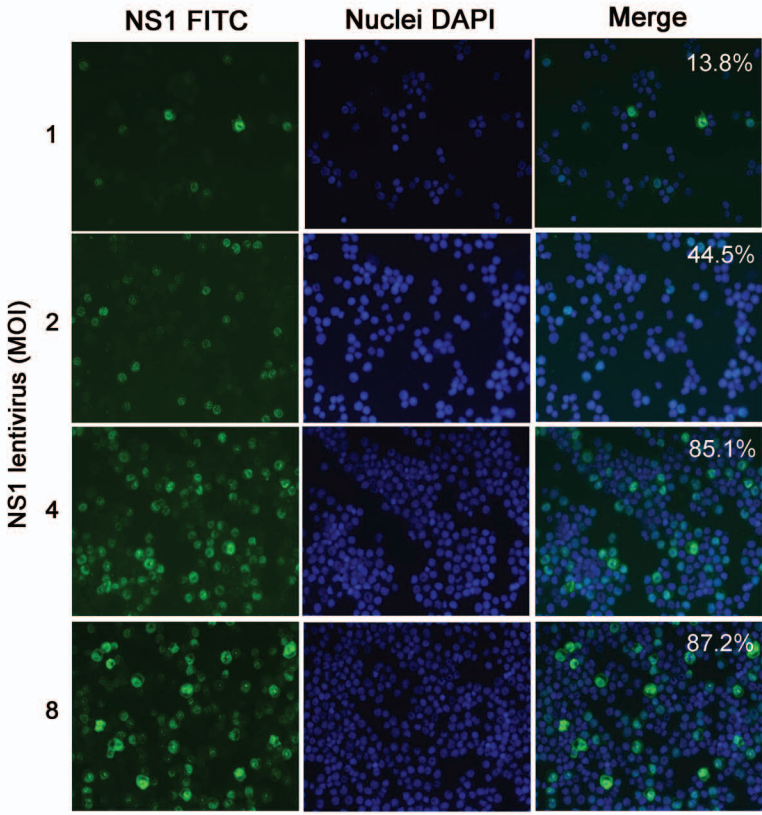

**B**

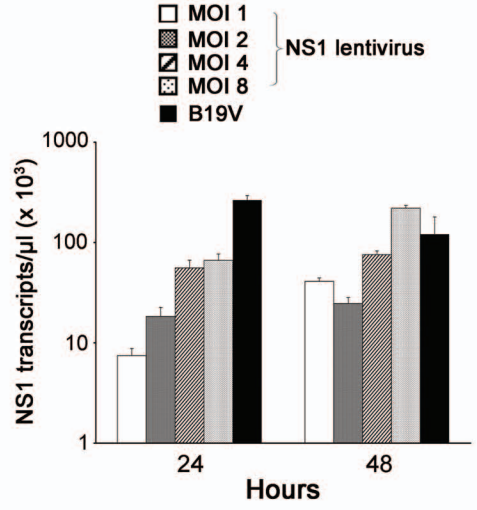

## Supplemental Figure 1

Titration of NS1 lentivirus. (A) To optimize our experimental conditions for NS1 expression, CD36<sup>+</sup> EPCs were transduced with NS1 lentivirus at an MOI of 1, 2, 4, or 8, followed by IF analysis using anti-Flag (NS1) antibody. (B) NS1 expression levels in NS1-transduced or B19V-  
5 infected CD36<sup>+</sup> EPCs were evaluated using a real-time RT-PCR. The cells were transduced with NS1 lentivirus at an MOI of 1, 2, 4, or 8, or infected with  $\sim 5 \times 10^{-1}$  infectious units/cell of B19V. Original magnification,  $\times 200$ .

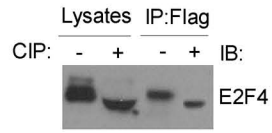

## Supplemental Figure 2

Calf intestine alkaline phosphatase (CIAP) treatment of E2F4. From CD36<sup>+</sup> EPCs transduced with NS1-lentivirus at an MOI of 4, whole cell lysates were prepared at 24 hpt, and subjected to immunoprecipitation with anti-Flag (NS1) antibody. A bound fraction, as well as whole cell lysates was treated with 10 units of CIAP at 37°C for 60 minutes, followed by 4-12% SDS-PAGE and immunoblot analysis with anti-E2F4 antibody. Bands were visualized by incubating a membrane with SuperSignal Chemiluminescent Reagent and then exposing to an X-ray film. IP, immunoprecipitation; IB, immunoblotting.

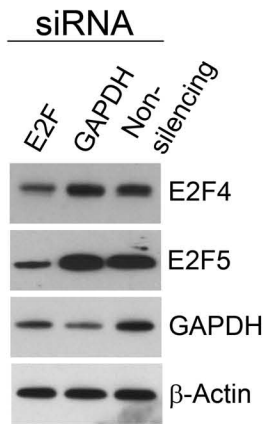

### **Supplemental Figure 3**

siRNA-mediated knockdown of E2F4 and E2F5. (A) CD36<sup>+</sup> EPCs were transduced with each lentivirus carrying siRNA against E2F4, E2F5, GAPDH, or non-silencing control. After 24 hours, cells were transduced with NS1 or control lentivirus and collected at 24 hpt for immunoblot analysis with antibodies specific for E2F4, E2F5, GAPDH, or  $\beta$ -Actin (an internal control)

Wan, et al., Supplemental Table 1

**Supplemental Table 1**

Total, live, and dead cell numbers of CD36<sup>+</sup> EPCs after B19V infection or NS1 transduction

|         |       | <b>0 h</b>     | <b>24 h</b>    | <b>48 h</b>    | <b>72 h</b>    | <b>96 h</b>      |
|---------|-------|----------------|----------------|----------------|----------------|------------------|
| Mock    | Total | 103 ± 10 (100) | 226 ± 18 (100) | 750 ± 35 (100) | 930 ± 54 (100) | 1820 ± 96 (100)  |
|         | Live  | 100 ± 9 (97)   | 220 ± 20 (97)  | 720 ± 43 (96)  | 880 ± 49 (95)  | 1730 ± 8 (95)    |
|         | Dead  | 3 ± 2 (3)      | 6 ± 2 (3)      | 30 ± 5 (4)     | 50 ± 4 (100)   | 90 ± 9 (5)       |
| B19     | Total | 113 ± 18 (100) | 63 ± 20 (100)  | 500 ± 23 (100) | 360 ± 18 (5)   | 530 ± 45 (100)   |
|         | Live  | 110 ± 20 (97)  | 150 ± 25 (92)  | 430 ± 25 (86)  | 290 ± 28 (81)  | 410 ± 51 (77)    |
|         | Dead  | 3 ± 2 (3)      | 13 ± 2 (8)     | 70 ± 6 (14)    | 70 ± 9 (19)    | 120 ± 10 (23)    |
| Control | Total | 102 ± 10 (100) | 240 ± 28 (100) | 520 ± 42 (100) | 810 ± 84 (100) | 1530 ± 121 (100) |
|         | Live  | 100 ± 9 (98)   | 230 ± 20 (96)  | 480 ± 35 (92)  | 720 ± 90 (89)  | 1330 ± 100 (87)  |
|         | Dead  | 2 ± 1 (2)      | 10 ± 3 (4)     | 40 ± 5 (8)     | 90 ± 7 (11)    | 200 ± 15 (13)    |
| NS1     | Total | 107 ± 11 (100) | 188 ± 14 (100) | 330 ± 34 (100) | 290 ± 48 (100) | 270 ± 61 (100)   |
|         | Live  | 105 ± 7 (98)   | 170 ± 17 (90)  | 270 ± 30 (82)  | 220 ± 53 (76)  | 175 ± 50 (65)    |
|         | Dead  | 2 ± 1 (2)      | 18 ± 3 (10)    | 40 ± 3 (18)    | 70 ± 5 (24)    | 95 ± 9 (35)      |

Cell numbers are shown as mean ± SD ( $\times 10^3$ ). Numbers in ( ) represent mean percentages (%).

**Supplemental Table 2**

BrdU incorporation (%) in the B19V-infected or NS1-transduced cells

---

|         | <b>24 h</b> | <b>48 h</b> | <b>72 h</b> |
|---------|-------------|-------------|-------------|
| Mock    | 58.4        | 41.0        | 47.8        |
| B19V    | 42.2        | 25.6        | 14.5        |
| Control | 47.7        | 54.3        | 52.1        |
| NS1     | 33.6        | 31.2        | 35.3        |

---

CD36<sup>+</sup> EPCs were B19V- or mock-infected, or NS1- or control-lentivirus transduced, followed by harvest at 24, 48, and 72 hour time points.



**Supplemental Table 3**

Cell populations (%) in different cell-cycle phases after B19V infection or NS1 transduction

|         | <b>Cell cycle</b> | <b>12 h</b> | <b>24 h</b> | <b>48 h</b> |
|---------|-------------------|-------------|-------------|-------------|
| Mock    | G1                | 27.4        | 27.7        | 31.7        |
|         | S                 | 67.9        | 71.5        | 63.7        |
|         | G2                | 4.7         | 0.8         | 4.6         |
| B19V    | G1                | 14.2        | 19.9        | 26.0        |
|         | S                 | 61.3        | 48.5        | 32.3        |
|         | G2                | 24.5        | 31.6        | 41.7        |
| Control | G1                | 37.2        | 41.8        | 48.5        |
|         | S                 | 52.8        | 46.3        | 42.9        |
|         | G2                | 10.0        | 11.9        | 8.6         |
| NS1     | G1                | 31.0        | 30.0        | 37.5        |
|         | S                 | 54.7        | 27.9        | 15.2        |
|         | G2                | 14.3        | 42.1        | 47.3        |

CD36<sup>+</sup> EPCs were B19V- or mock-infected, or NS1- or control-lentivirus transduced, followed by harvests at 12, 24, and 48 hour time points.

**Supplemental Table 4**Total, live, and dead cell numbers of CD36<sup>+</sup> EPCs after NS1 or NS1mt transduction

|         |       | <b>0 h</b>     | <b>12 h</b>    | <b>24 h</b>     | <b>48 h</b>      |
|---------|-------|----------------|----------------|-----------------|------------------|
| NS1     | Total | 448 ± 51 (100) | 545 ± 50 (100) | 674 ± 75 (100)  | 518 ± 49 (100)   |
|         | Live  | 430 ± 49 (96)  | 480 ± 50 (88)  | 560 ± 80 (83)   | 389 ± 36 (75)    |
|         | Dead  | 18 ± 2 (4)     | 65 ± 5 (12)    | 114 ± 5 (17)    | 129 ± 12 (25)    |
| NS1mt   | Total | 487 ± 36 (100) | 808 ± 65 (100) | 975 ± 75 (100)  | 510 ± 100 (100)  |
|         | Live  | 468 ± 29 (96)  | 727 ± 42 (90)  | 839 ± 30 (86)   | 1193 ± 125 (79)  |
|         | Dead  | 19 ± 3 (4)     | 81 ± 7 (10)    | 136 ± 10 (14)   | 317 ± 15 (21)    |
| Control | Total | 478 ± 49 (100) | 796 ± 74 (100) | 1172 ± 84 (100) | 2300 ± 108 (100) |
|         | Live  | 459 ± 40 (96)  | 748 ± 85 (94)  | 1090 ± 85 (93)  | 2116 ± 125 (92)  |
|         | Dead  | 19 ± 2 (4)     | 48 ± 3 (6)     | 82 ± 6 (7)      | 184 ± 13 (8)     |

Cell numbers are expressed as mean ± SD ( $\times 10^3$ ). Numbers in ( ) represent mean percentages (%).

**Supplemental Table 5**

Cell populations (%) in different cell-cycle phases after NS1 or NS1mt transduction

---

|       | <b>Cell cycle</b> | <b>12 h</b> | <b>24 h</b> | <b>48 h</b> |
|-------|-------------------|-------------|-------------|-------------|
| NS1   | G1                | 31.1        | 30.1        | 37.5        |
|       | S                 | 54.6        | 27.8        | 15.2        |
|       | G2                | 14.3        | 42.1        | 47.3        |
| NS1mt | G1                | 37.2        | 38.2        | 48.4        |
|       | S                 | 53.6        | 42.4        | 36.8        |
|       | G2                | 9.2         | 19.4        | 14.8        |

---

CD36<sup>+</sup> EPCs were transduced with NS1 or NS1mt (NLS mutant) lentivirus.

**Supplemental Table 6**

Effects of siRNA treatment on cell populations (%) in different cell cycle phases

| siRNA         | Cell cycle | Control |      | NS1  |      |
|---------------|------------|---------|------|------|------|
|               |            | 24 h    | 48 h | 24 h | 48 h |
| Non-silencing | G1         | 37.0    | 30.6 | 19.9 | 13.4 |
|               | S          | 52.8    | 57.6 | 22.0 | 0.2  |
|               | G2         | 10.2    | 11.8 | 58.1 | 84.6 |
| GAPDH         | G1         | 41.8    | 45.6 | 24.0 | 19.2 |
|               | S          | 46.3    | 42.6 | 22.9 | 2.0  |
|               | G2         | 11.9    | 11.8 | 53.1 | 78.8 |
| E2F4          | G1         | 53.4    | 52.0 | 30.7 | 28.2 |
|               | S          | 36.2    | 37.3 | 38.4 | 26.2 |
|               | G2         | 10.4    | 10.7 | 30.9 | 45.6 |
| E2F5          | G1         | 53.4    | 53.4 | 62.3 | 45.6 |
|               | S          | 34.5    | 34.5 | 23.6 | 27.0 |
|               | G2         | 8.6     | 12.1 | 14.1 | 27.4 |

After specific siRNA treatment for 24 hours, CD36<sup>+</sup> EPCs were transduced with NS1 or control lentivirus, and harvested at 24 and 48 hpt.
